# Supplementary material for: A red emitting fluorescent probe for instantaneous sensing of thiophenol in both aqueous medium and living cells with a large Stokes shift
Source: Royal Society of Chemistry journal article supplement (doi:10.1039/c5tc03977k), 2016-01-01
Supplement: c5tc03977k1.pdf [file c5tc03977k1.pdf]

## Supporting Information

### A red emitting fluorescence probe for instantaneous sensing of thiophenol in both aqueous medium and living cells with a large Stokes shift

Xingjiang Liu,<sup>a</sup> Fengpei Qi,<sup>a</sup> Yuanan Su,<sup>a</sup> Wenqiang Chen,<sup>a</sup> Lei Yang<sup>a</sup> and Xiangzhi Song<sup>ab\*</sup>

<sup>a</sup> College of Chemistry & Chemical Engineering, Central South University, Changsha, Hunan Province, P. R. China, 410083.

<sup>b</sup> State Key Laboratory of Fine Chemicals, Dalian University of Technology, Dalian, Liaoning Province, P. R. China, 116024.

\* Corresponding author. Fax: +86-731-88836954; Tel: +86-731-88836954; Email: song@rowland.harvard.edu

### Contents

|                                                              |           |
|--------------------------------------------------------------|-----------|
| <b>Table S1</b> .....                                        | <b>2</b>  |
| <b>Fig. S1</b> .....                                         | <b>4</b>  |
| <b>Fig. S2</b> .....                                         | <b>5</b>  |
| <b>Fig. S3</b> .....                                         | <b>5</b>  |
| <b>Fig. S4</b> .....                                         | <b>6</b>  |
| <b>Fig. S5</b> .....                                         | <b>6</b>  |
| <b>Fig. S6</b> .....                                         | <b>7</b>  |
| <b>Fig. S7</b> .....                                         | <b>7</b>  |
| <b>Fig. S8</b> .....                                         | <b>8</b>  |
| <b>Fig. S9</b> .....                                         | <b>8</b>  |
| <b>Fig. S10</b> .....                                        | <b>9</b>  |
| <b>Fig. S11</b> .....                                        | <b>9</b>  |
| <b>Fig. S12</b> .....                                        | <b>10</b> |
| <b>Fig. S13</b> .....                                        | <b>10</b> |
| <b>Photo- and thermo- stability studies of Probe 1</b> ..... | <b>11</b> |
| <b>Fig. S14</b> .....                                        | <b>12</b> |

---

|                       |           |
|-----------------------|-----------|
| <b>Fig. S15</b> ..... | <b>12</b> |
| <b>Fig. S16</b> ..... | <b>13</b> |
| <b>Fig. S17</b> ..... | <b>13</b> |
| <b>Fig. S18</b> ..... | <b>14</b> |
| <b>Fig. S19</b> ..... | <b>14</b> |
| <b>Fig. S20</b> ..... | <b>15</b> |
| <b>Fig. S21</b> ..... | <b>15</b> |
| <b>Fig. S22</b> ..... | <b>16</b> |

**Table S1** Fluorescent probes for thiophenol.

| Probe                                                                               | $\lambda_{\text{ex}}/\lambda_{\text{em}}$ | Stokes shift | Response time | Literature                                 |
|-------------------------------------------------------------------------------------|-------------------------------------------|--------------|---------------|--------------------------------------------|
| 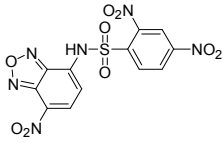   | 465 nm/555 nm                             | 90 nm        | 10 min        | Angew. Chem., Int. Ed. 2007, 46, 8445-8448 |
|    | 335 nm/403 nm                             | 68 nm        | 20 min        | Chem. Commun. 2010, 46, 1944-1946.         |
|    | 481 nm/590 nm                             | 109 nm       | 15 min        | Anal. Chem. 2012, 84, 4915-4920            |
|   | 461 nm/494 nm                             | 33 nm        | 40 min        | Chem. Commun. 2010, 46, 1503-1505          |
|  | 370 nm/515 nm                             | 145 nm       | 30 min        | Anal. Chem. 2014, 86, 3037-3042            |
|  | 490 nm/670 nm                             | 180 nm       | 10 min        | Anal. Chem. 2014, 86, 8835-8841            |
|  | 608 nm/633 nm                             | 25 nm        | 90 min        | Anal. Chem. 2015, 87, 399-405              |
|  | 547 nm/568 nm                             | 21 nm        | 70 min        | Analyst, 2012, 137, 3921-3924              |
|  | 545 nm/587 nm                             | 42 nm        | 10 min        | Chem. Commun. 2010, 46, 1503-1505          |

---

|                                                                                   |               |        |        |                                            |
|-----------------------------------------------------------------------------------|---------------|--------|--------|--------------------------------------------|
| 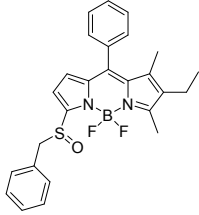 | 484 nm/568 nm | 84 nm  | 36 min | Dyes Pigm.<br>2013, 96, 328-<br>332        |
|  | 546 nm/565 nm | 19 nm  | 20 min | J. Phys. Chem.<br>B, 2011, 115,<br>642-647 |
|  | 477 nm/606 nm | 129 nm | 2 min  | This work                                  |

---

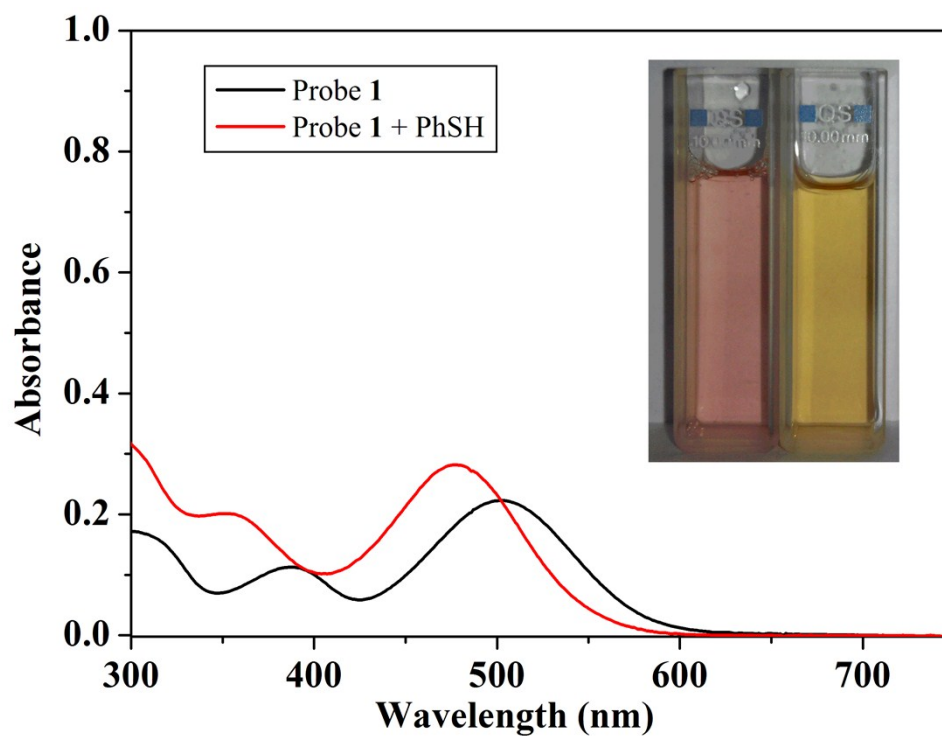

**Fig. S1** Absorption spectra of Probe 1 (10.0 μM) in the absence/presence of thiophenol (5.0 equiv.) in HEPES buffer (20.0 mM, pH = 7.4, 1.0 mM CTAB). Inset: photographs of Probe 1 before (left) and after (right) addition of thiophenol.

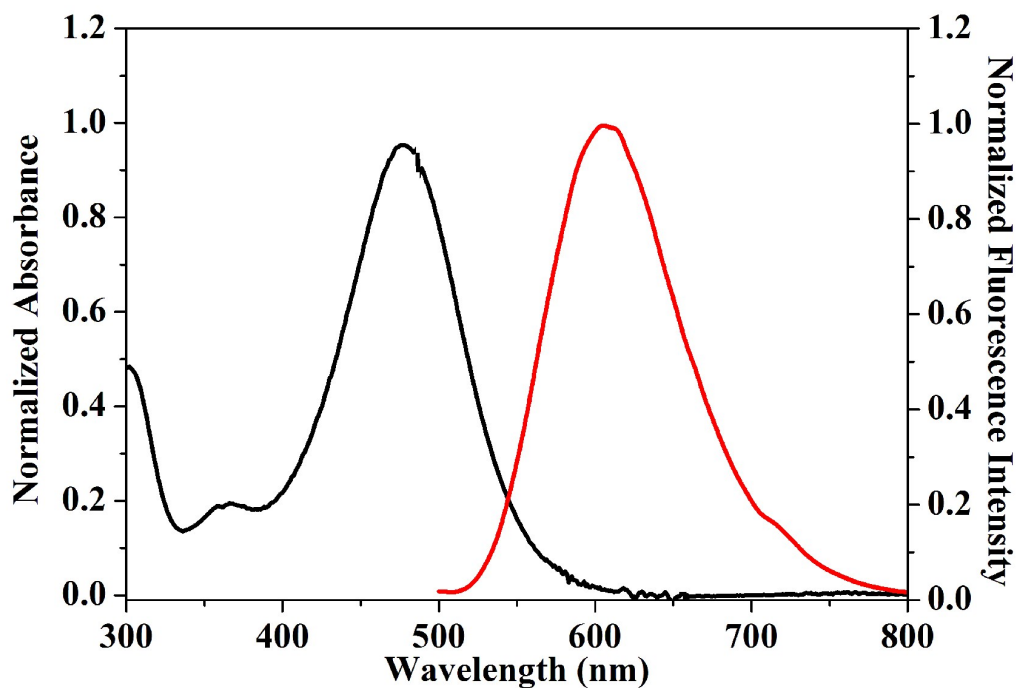

**Fig. S2** Normalized absorption (black line) and fluorescence (red line) spectra of dye 4 in HEPES buffer (10.0 mM, pH = 7.4, 1.0 mM CTAB).

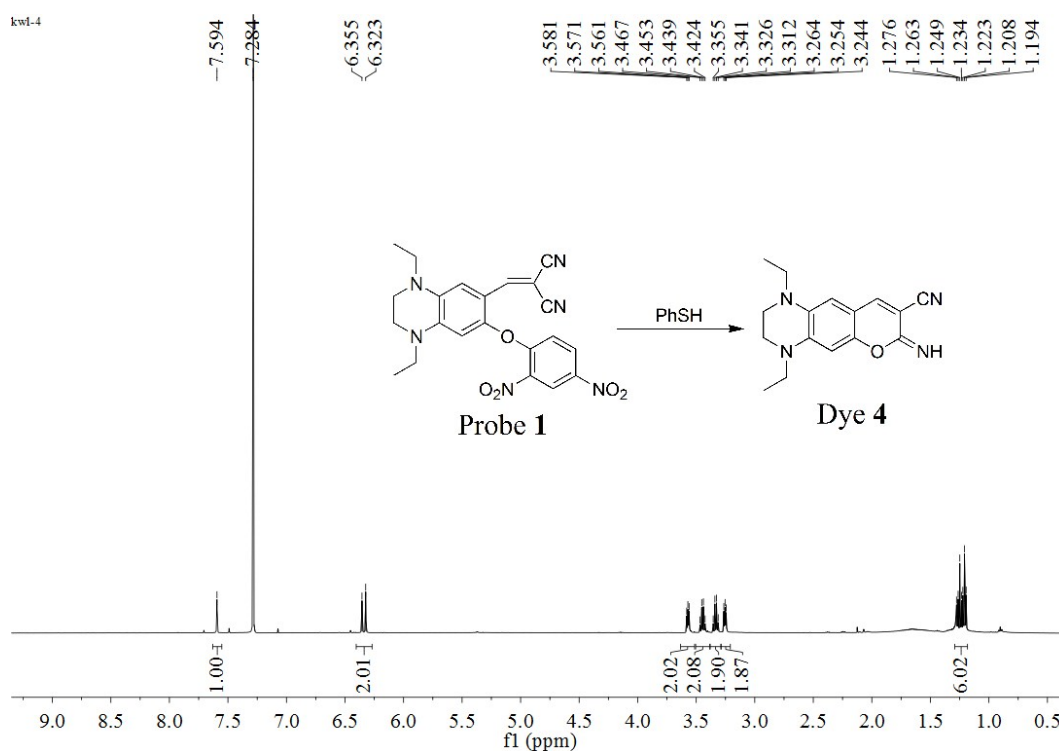

**Fig. S3** <sup>1</sup>H NMR spectrum of the reaction product of Probe 1 with thiophenol in CDCl<sub>3</sub>.

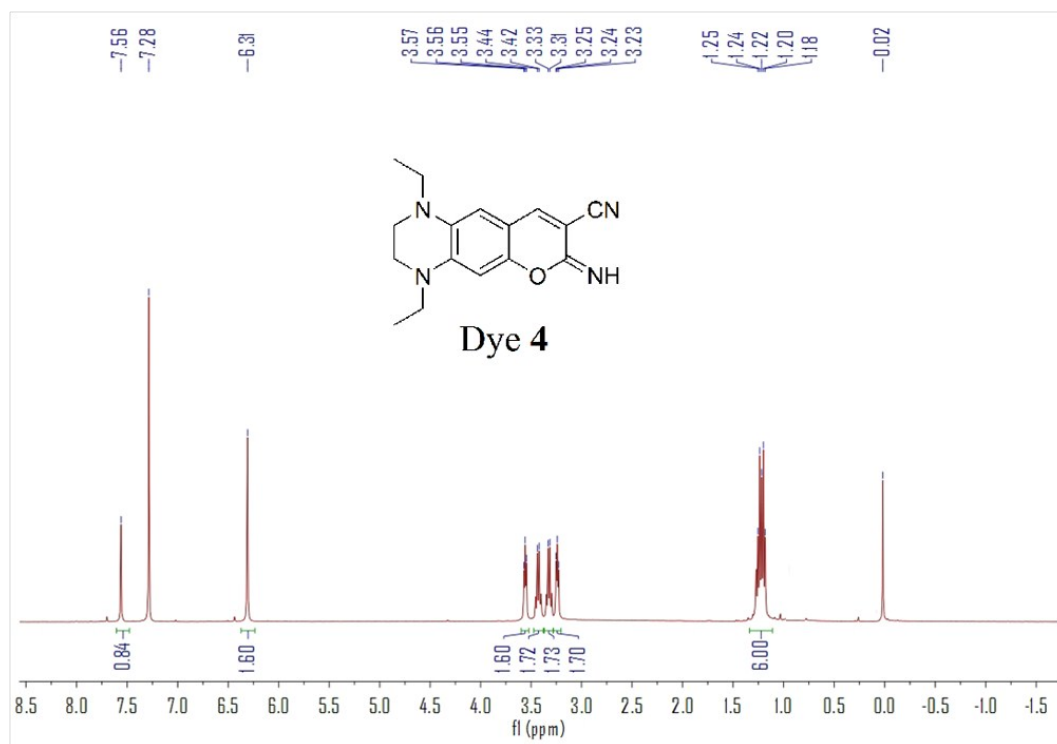

**Fig. S4** <sup>1</sup>H NMR spectrum of dye 4 in CDCl<sub>3</sub>.

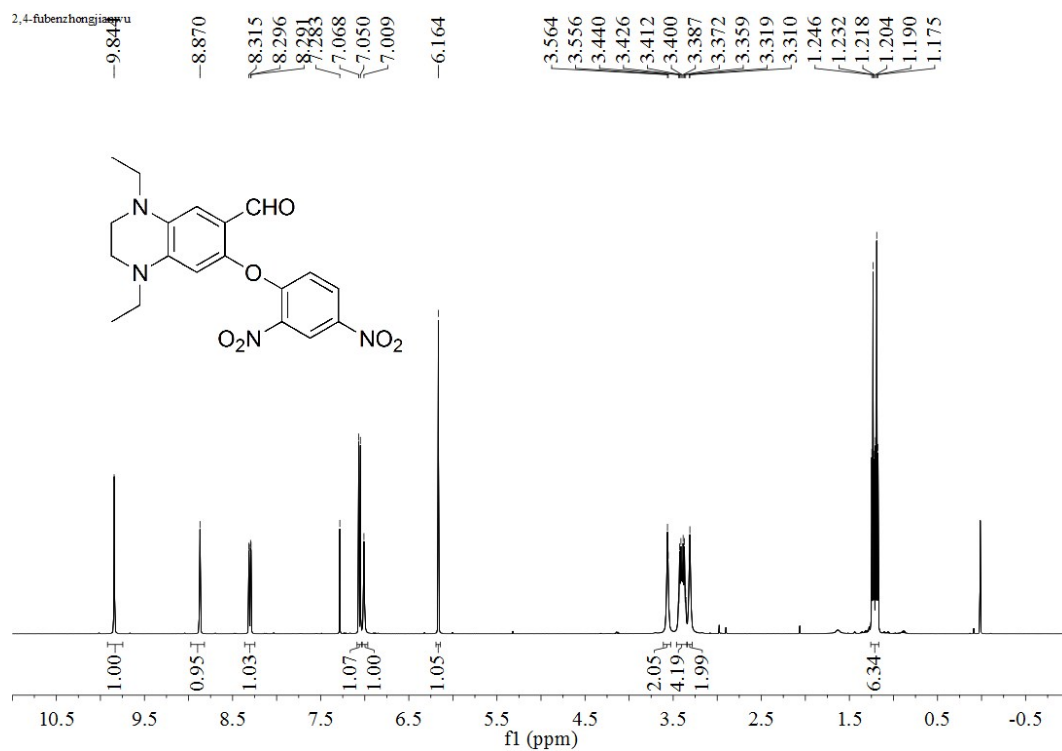

**Fig. S5** <sup>1</sup>H NMR spectrum of compound 3 in CDCl<sub>3</sub>.

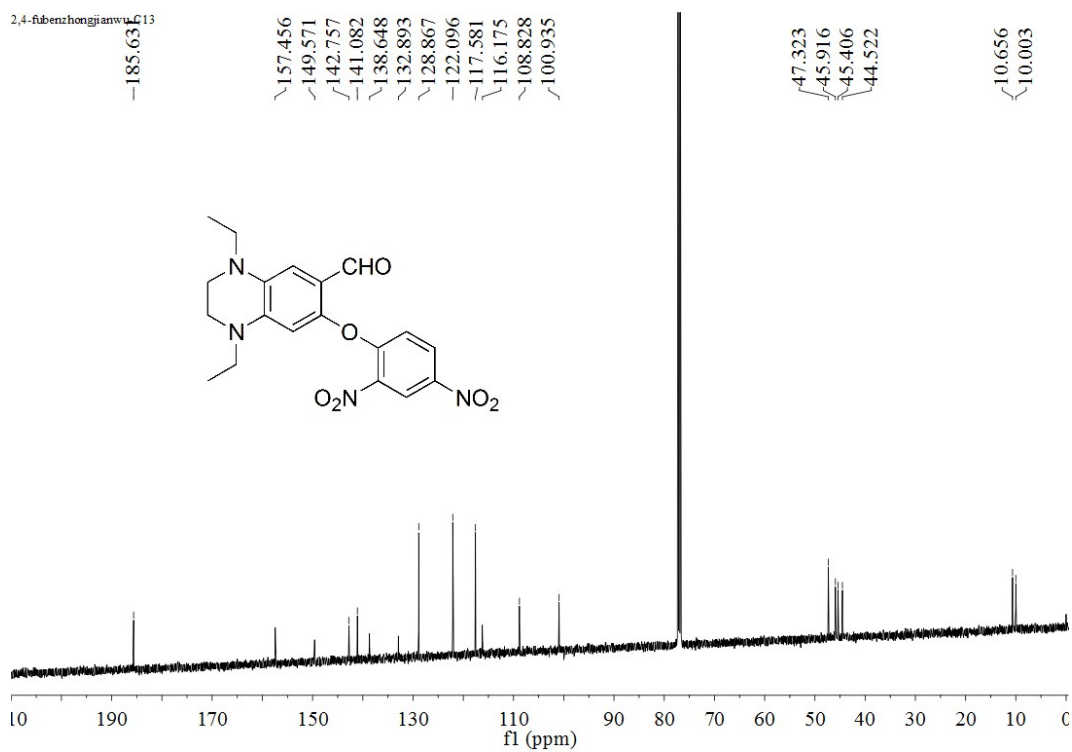

**Fig. S6**  $^{13}\text{C}$  NMR spectrum of compound **3** in  $\text{CDCl}_3$ .

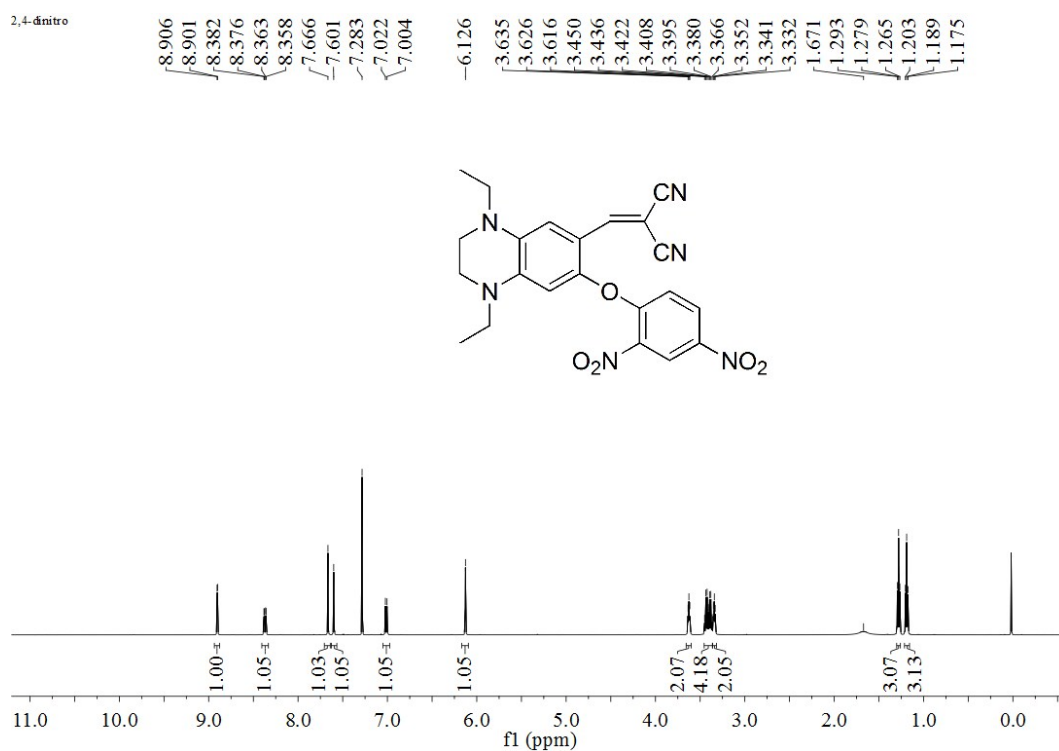

**Fig. S7**  $^1\text{H}$  NMR spectrum of Probe **1** in  $\text{CDCl}_3$ .

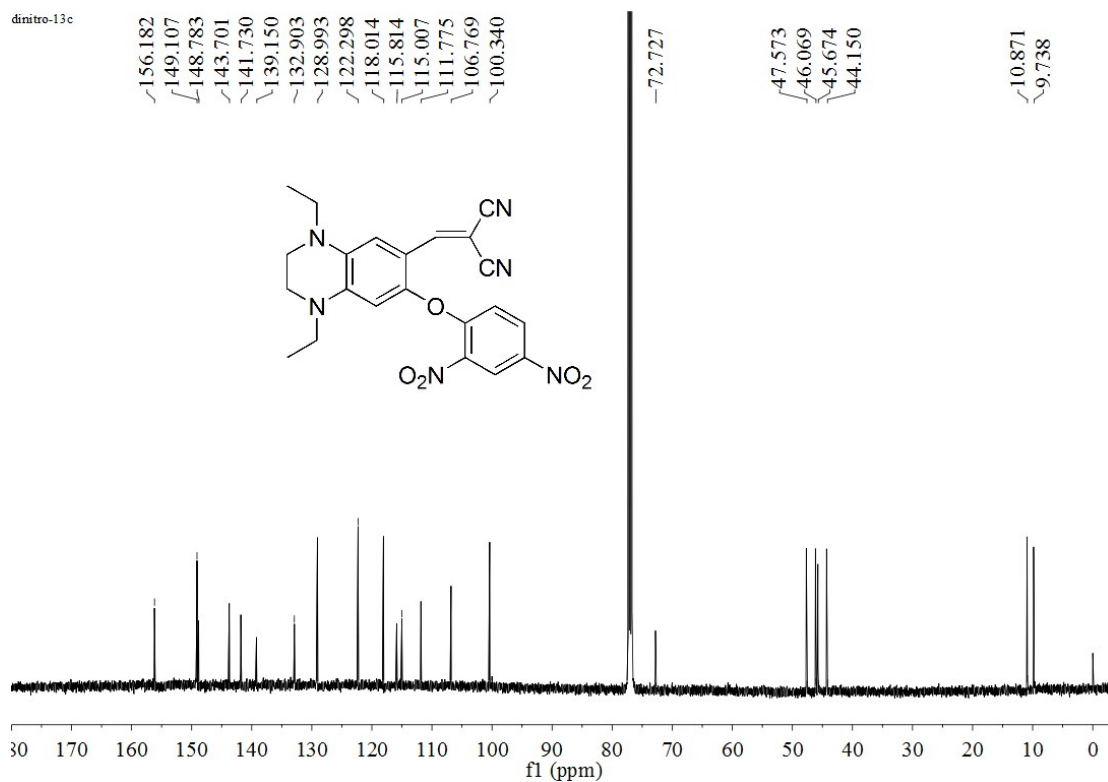

Fig. S8  $^{13}\text{C}$  NMR spectrum of Probe 1 in  $\text{CDCl}_3$ .

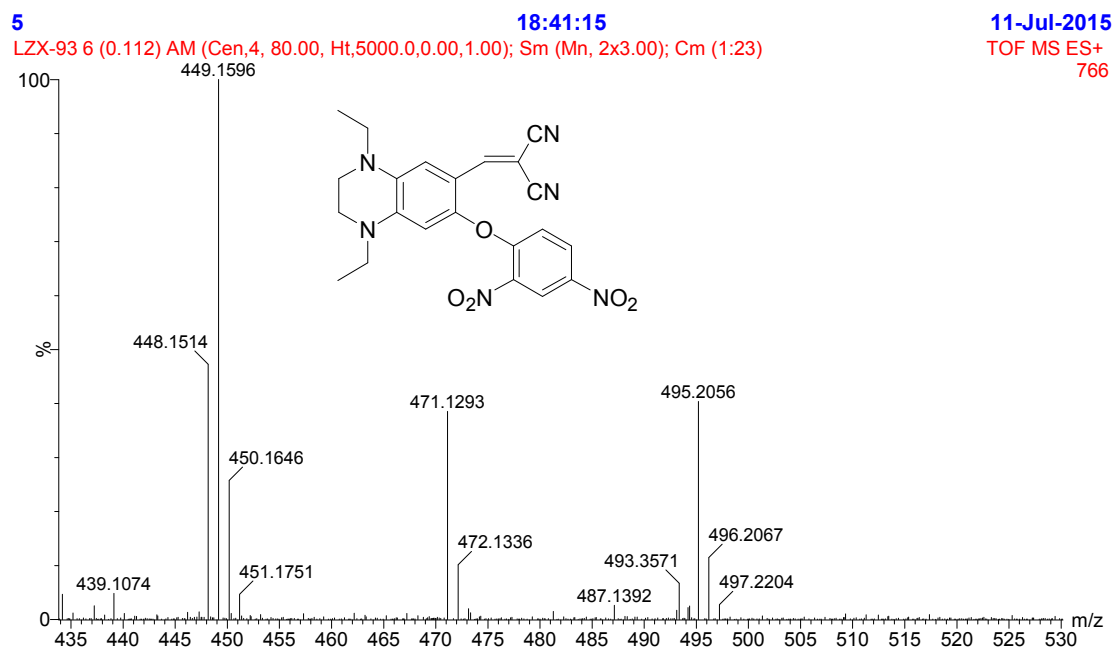

Fig. S9 HRMS spectrum of Probe 1.





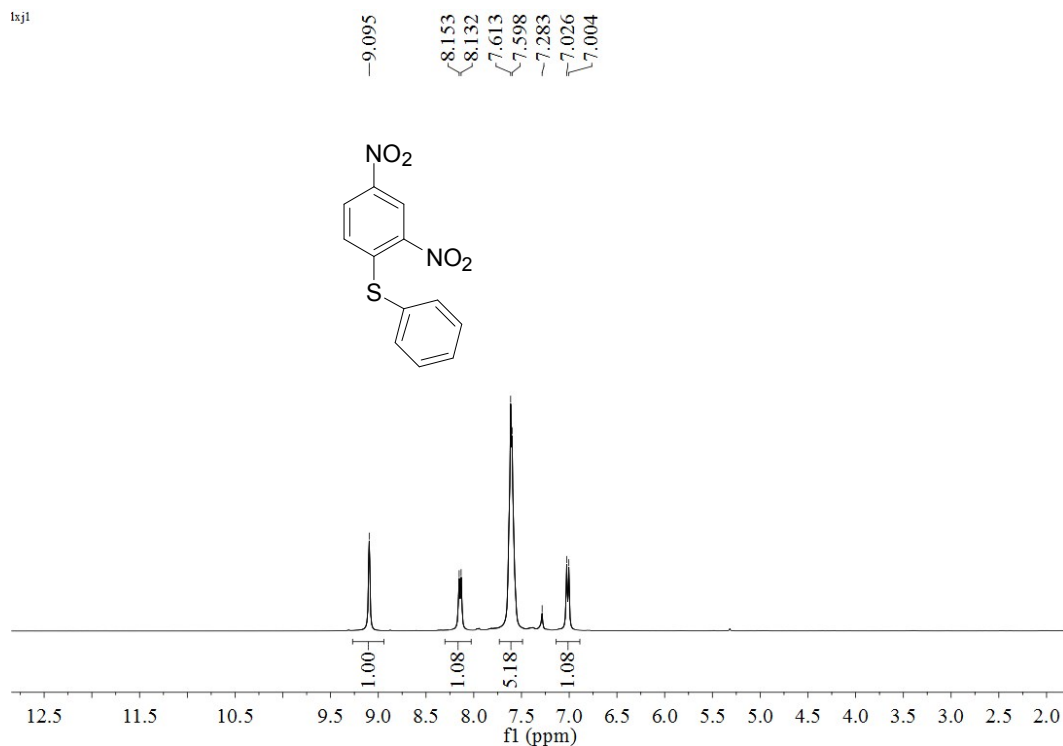

**Fig. S12**  $^1\text{H}$  NMR spectrum of the product from the reaction of Probe 1 with thiophenol.

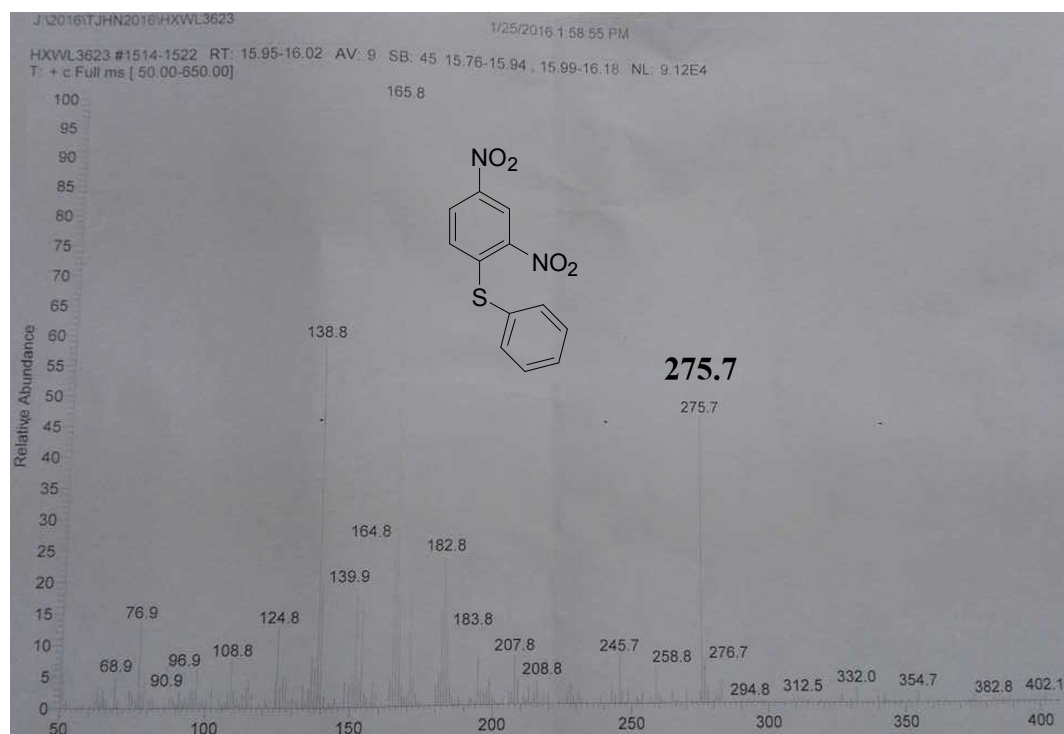

**Fig. S13** The low-resolution mass spectrum of the reaction product of Probe 1 with thiophenol.

### **Photo- and thermo- stability studies of Probe 1**

We investigated the photo- and thermo- stability of Probe 1 and found that this probe showed excellent photo- and thermo- stability. As shown in Fig. S14, only 8.7% of the probe was degraded in CH<sub>3</sub>CN after 3 hours irradiation. The thermal gravimetric analysis (TGA) curve of Probe 1 demonstrated that the decomposition temperature was from 217 to 242 °C (Fig. S15). Furthermore, we studied the stabilities of Probe 1 under the physiological condition. We conducted the experiments in HEPES buffer (20.0 mM, pH = 7.4) containing 20% DMSO (DMSO was used to improve the solubility of Probe 1 in aqueous media) instead of the micell system (PBS buffer (20.0 mM, pH = 7.4) with 1.0 mM CTAB), which may be vulnerable during heating or irradiation. The photostability studies showed that 8.6% and 34.4% of the probe was degraded after 1 hour and 2 hour irradiation under a 300 mW, 532 nm continuous wave laser, respectively (Fig. S18). We also investigated the fluorescence of HeLa cells incubated with Probe 1 (10.0 μM) under the continuous irradiation with 488 nm wave laser (Fig. S19). After 30 min irradiation, the fluorescence change of the cells was negligible. In addition, the thermo-stability of Probe 1 was studied under physiological condition at 25 °C, 37 °C, and 45 °C, respectively, by observing its absorption spectral change. As shown in Figure S20, the absorption spectra of this probe stayed unchanged after incubation for 1 hour at 25 °C and 37 °C, and negligible change was observed at 45 °C. Therefore, it can be concluded that Probe 1 exhibited good photo- and thermo- stability under physiological condition and can serve as a good candidate for potential biological use.

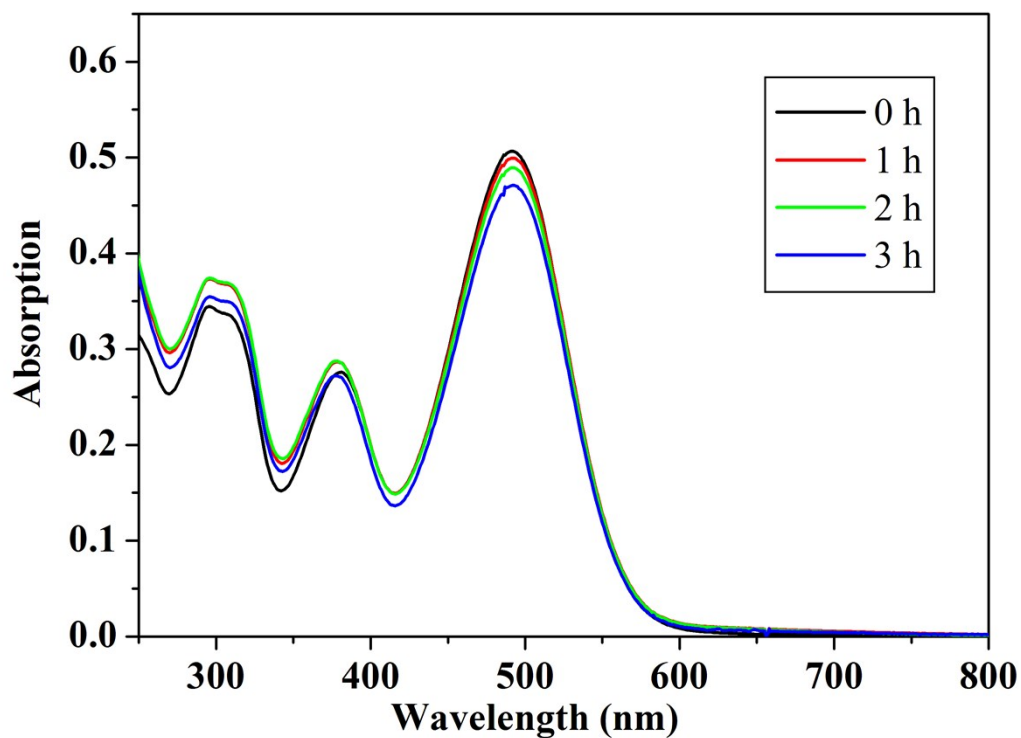

**Fig. S14** Photodegradation of Probe **1** in CH<sub>3</sub>CN under the continuous irradiation with a 300 mW, 532 nm continuous wave laser. The distance between the light source and the sample is 10 cm.

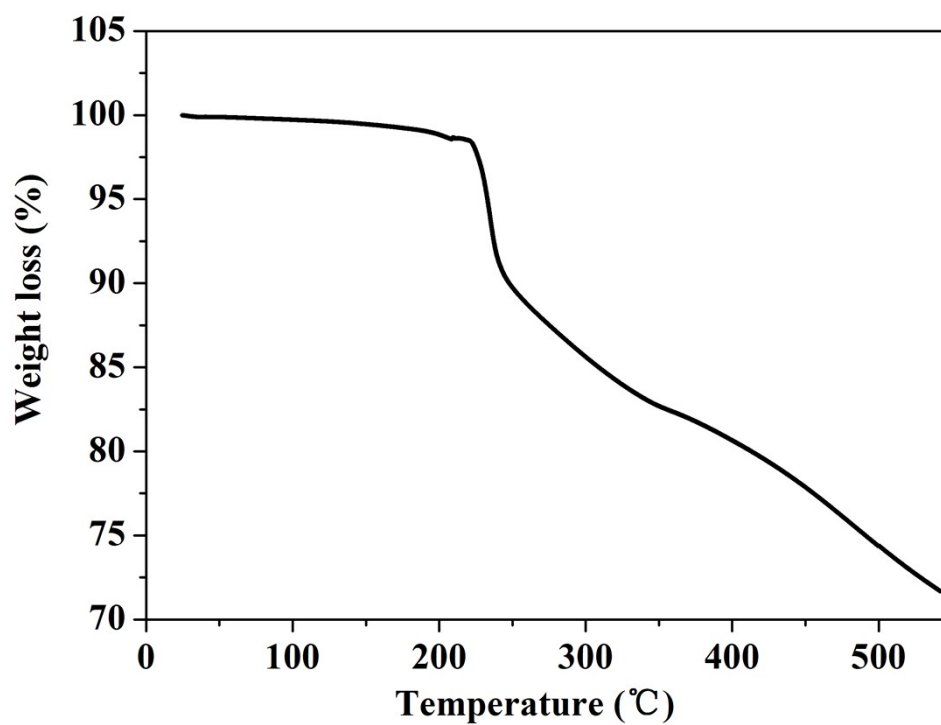

**Fig. S15** Thermal gravimetric analysis (TGA) curve of Probe **1**. Heating rate: 10 °C min<sup>-1</sup>.

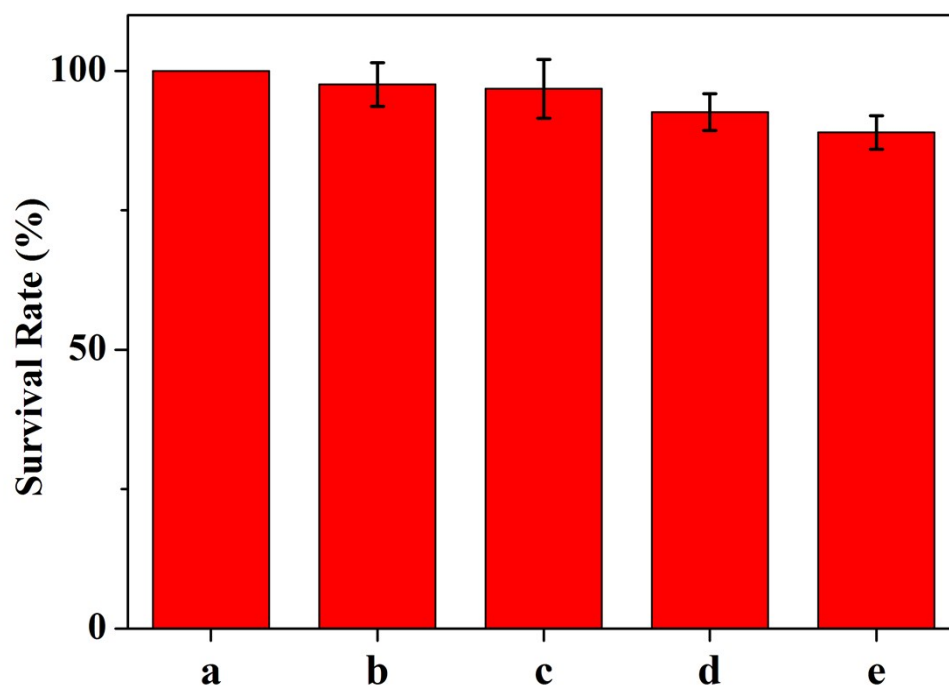

**Fig. S16** Cytotoxicity assay of Probe 1 at different concentrations (a: 0.0  $\mu\text{M}$ ; b: 2.0  $\mu\text{M}$ ; c: 5.0  $\mu\text{M}$ ; d: 7.0  $\mu\text{M}$ ; e: 10.0  $\mu\text{M}$ ) for HNE-2 cells.

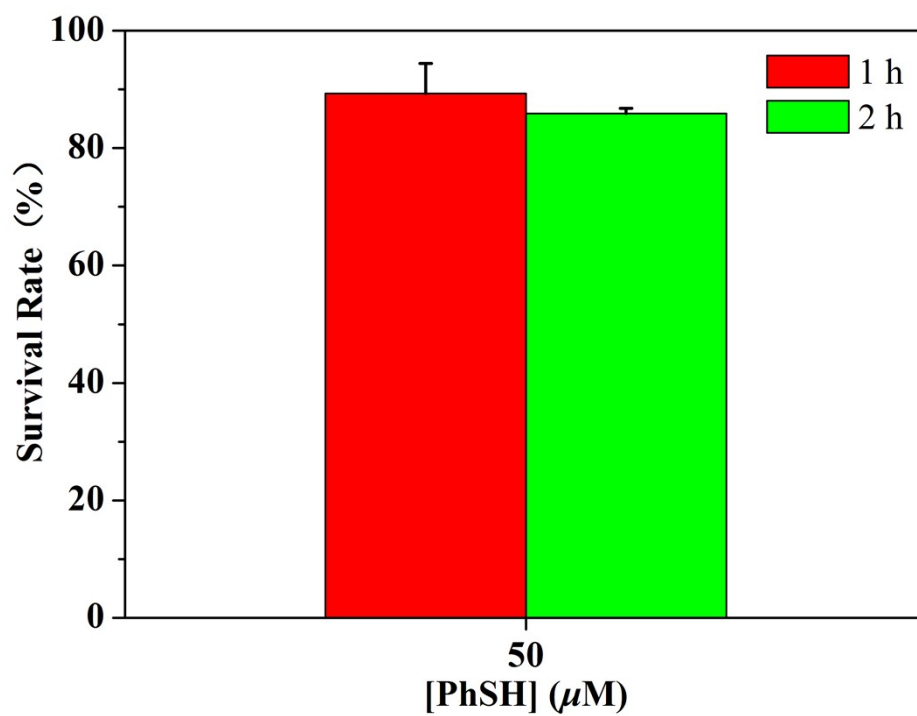

**Fig. S17** Cytotoxicity assay of thiophenol for HNE-2 cells.

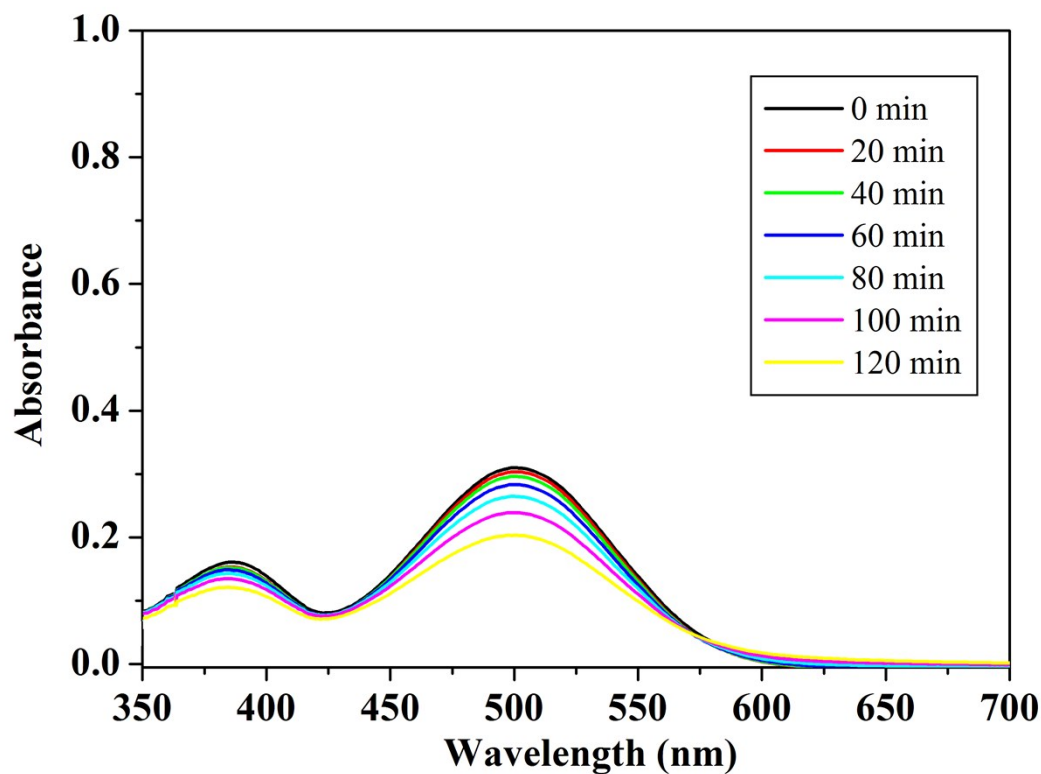

**Fig. S18** Photodegradation of Probe 1 in HEPES buffer (10.0 mM, pH 7.4) containing 20% DMSO under the irradiation with a 300 mW, 532 nm continuous wave laser by observing its absorbance. The distance between the light source and the sample is 10 cm.

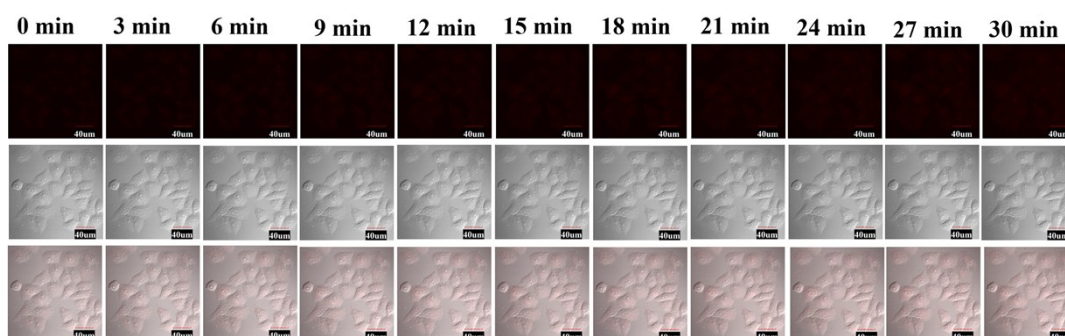

**Fig. S19** Fluorescence (top row), bright field (middle row) and merged (bottom row) images of HeLa cells after incubation with Probe 1 (10.0  $\mu$ M) under the continuous irradiation with 488 nm wave laser at different time. Images were acquired from 560-630 nm for red fluorescence.

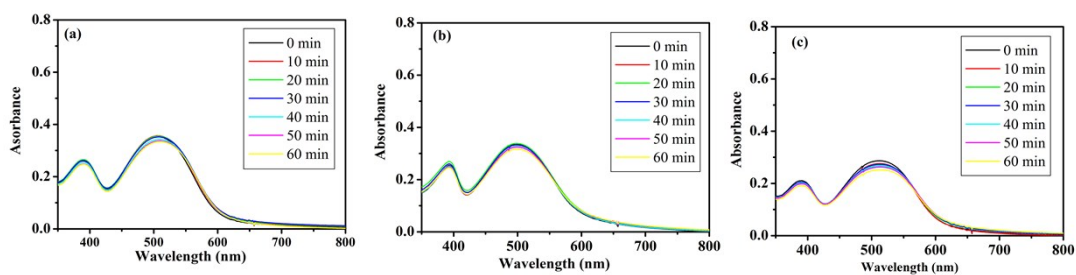

**Fig. S20** Thermo-stability of Probe **1** at 25 °C (a), 37 °C (b) and 45 °C (c) in HEPES buffer (20.0 mM, pH = 7.4) containing 20% DMSO.

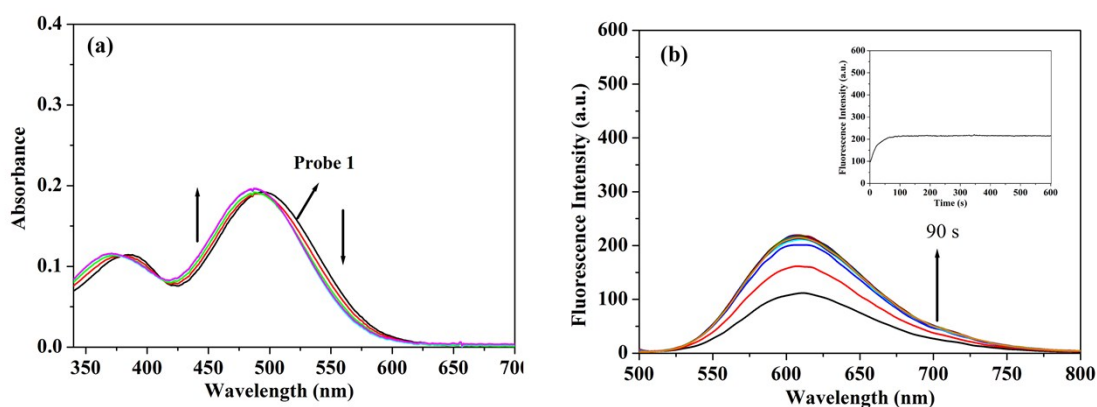

**Fig. S21** Time-dependent absorption (a) and fluorescence (b) spectra of Probe **1** (10.0  $\mu\text{M}$ ) with 1 equiv. of PhSH in HEPES buffer (20.0 mM, pH = 7.4, 1.0 mM CTAB). Inset in Fig. R4(b): Kinetic of fluorescence enhancement rate at 606 nm for Probe **1** (10.0  $\mu\text{M}$ ) in the presence of PhSH (1.0 equiv.) in HEPES buffer (20.0 mM, pH = 7.4, 1.0 mM CTAB).

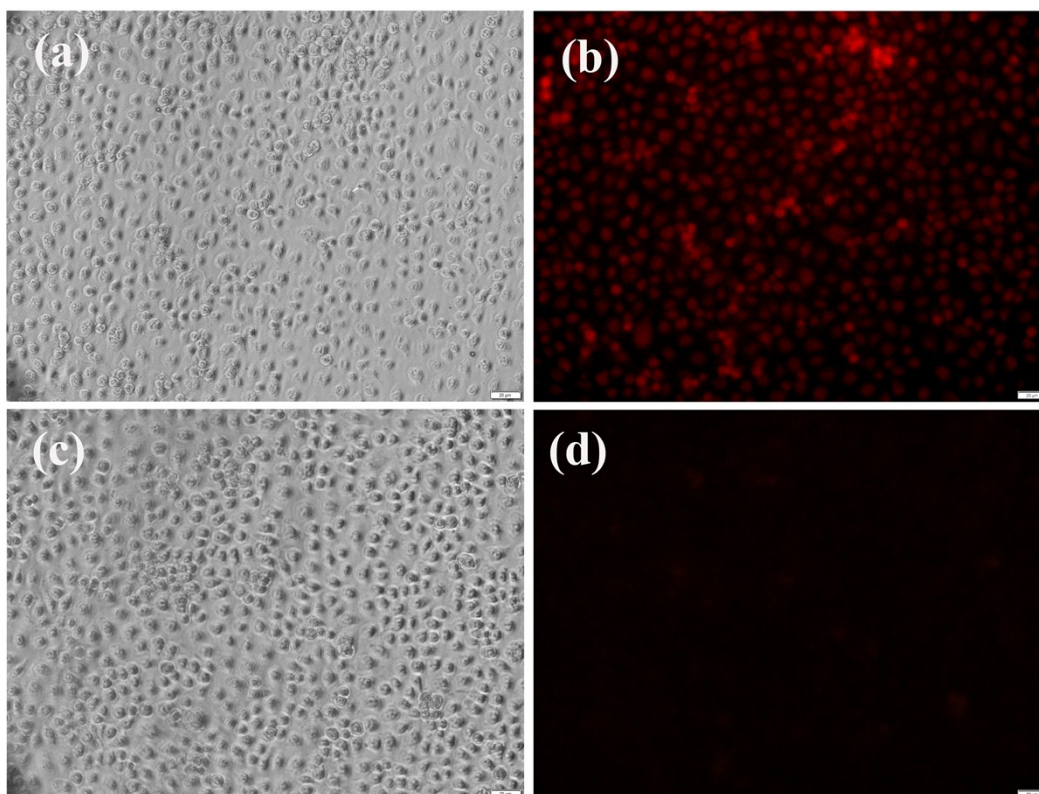

**Fig. S22** Fluorescence images of thiophenol in living HNE-2 cells. (a) Bright field and (b) fluorescence images of cells pretreated with thiophenol ( $50.0 \mu\text{M}$ ) and then incubated with Probe **1** ( $10.0 \mu\text{M}$ ) for 30 min at  $37 \text{ }^\circ\text{C}$ . (c) Bright field and (d) fluorescence images of cells incubated with Probe **1** ( $10.0 \mu\text{M}$ ) for 30 min at  $37 \text{ }^\circ\text{C}$ . The cells were magnified 20 times.
